# Supplementary material for: Responses of Humoral and Cellular Immune Mediators in BALB/c Mice to LipX (PE11) as Seed Tuberculosis Vaccine Candidates
Source: MDPI journal article supplement (doi:10.3390/genes13111954), 2022-10-26
Supplement: s1 [file s1]

## Supplementary material

**Table S1.** Comparison of cytokine production induced by LipX-His or PHA or without induction in the pcDNA3.1-*lipX*-immunized group.

| Cytokines     | Induction      |                |                | <i>p</i> -value |
|---------------|----------------|----------------|----------------|-----------------|
|               | LipX-His       | PHA            | No induction   |                 |
| IL-4          | 59.88 + 8.32   | 39.44 + 7.89   | 32.02 + 2.50   | 0.000           |
| IL-10         | 23.86 ± 6.77   | 43.57 ± 6.49   | 18.71 ± 11.09  | 0.232           |
| IL-12         | 221.14 ± 46.23 | 54.86 ± 13.98  | 52.29 ± 11.93  | 0.000           |
| IFN- $\gamma$ | 441.22 ± 54.55 | 307.22 ± 51.77 | 258.56 ± 16.43 | 0.000           |
